# Supplementary material for: Radical and diradical states of bis(molybdenocene dithiolene) complexes
Source: Royal Society of Chemistry journal article supplement (doi:10.1039/d4dt00694a), 2024-01-01
Supplement: d4dt00694a1.pdf [file d4dt00694a1.pdf]

## Radical and diradical states of bis(molybdenocene dithiolene) complexes

Khalil Youssef, Corentin Poidevin, Antoine Vacher, Arnaud Fihey, Yann Le Gal, Thierry Roisnel, Dominique Lorcy\*

*Univ Rennes, CNRS, ISCR (Institut des Sciences Chimiques de Rennes) - UMR 6226, F-35000 Rennes, France*

### Table of contents

|                                                                                                                                                                                                   |     |
|---------------------------------------------------------------------------------------------------------------------------------------------------------------------------------------------------|-----|
| Table S1 Intramolecular Bond lengths in the proligands <b>2</b> , <b>3</b> , <b>4</b> and <b>5</b>                                                                                                | S2  |
| Table S2 Significant bond lengths and angles of <b>Cp<sub>2</sub>MoS<sub>2</sub></b> and <b>Cp<sub>2</sub>MoS<sub>2</sub>CO</b>                                                                   | S2  |
| Table S3. Crystallographic data of the proligands <b>2</b> , <b>3</b> , <b>4</b> and <b>5</b>                                                                                                     | S3  |
| Table S4. Crystallographic data of the mononuclear complexes                                                                                                                                      | S3  |
| Figure S1. Top and side views of the molecular structure of compound <b>3</b>                                                                                                                     | S4  |
| Figure S2. Molecular structures of <b>Cp<sub>2</sub>MoS<sub>2</sub></b> and <b>Cp<sub>2</sub>MoS<sub>2</sub>CO</b>                                                                                | S4  |
| Figure S3. Cyclic voltammogram of <b>Mo<sub>2</sub>Si<sub>2</sub></b> in DMSO                                                                                                                     | S4  |
| Figure S4. Differential UV-vis-NIR absorption spectra of <b>Modt<sup>••</sup></b> to <b>Modt<sup>2+</sup></b>                                                                                     | S5  |
| Figure S5. Simulated UV-vis-NIR absorption spectra of <b>Mo<sub>2</sub>S<sub>2</sub></b> , <b>Mo<sub>2</sub>S<sub>2</sub><sup>••</sup></b> and <b>Mo<sub>2</sub>S<sub>2</sub><sup>2+</sup></b>    | S5  |
| Figure S6. Simulated UV-vis-NIR absorption spectra of <b>Mo<sub>2</sub>Si<sub>2</sub></b> , <b>Mo<sub>2</sub>Si<sub>2</sub><sup>••</sup></b> and <b>Mo<sub>2</sub>Si<sub>2</sub><sup>2+</sup></b> | S6  |
| Figure S7. UV-vis-NIR spectrum of (a) <b>Mo<sub>2</sub>S<sub>2</sub><sup>••</sup></b> in DMSO; (b) <b>Mo<sub>2</sub>S<sub>2</sub><sup>2+</sup></b> in MeCN                                        | S6  |
| Figure S8. UV-vis-NIR spectrum of (a) <b>Mo<sub>2</sub>Si<sub>2</sub><sup>••</sup></b> , (b) <b>Mo<sub>2</sub>Si<sub>2</sub><sup>2+</sup></b> in DMSO                                             | S7  |
| Figure S9. EPR spectra of ( <b>Mo<sub>2</sub>Si<sub>2</sub></b> )(BF <sub>4</sub> ) <sub>2</sub> in CH <sub>3</sub> CN                                                                            | S7  |
| Figures S10-S19. NMR spectra                                                                                                                                                                      | S8  |
| Figures S20-S23. HRMS spectra                                                                                                                                                                     | S13 |

**Table S1** Intramolecular Bond lengths (in Å) in the following proligands: **2**, **3**, **4** and **5**.

| Bonds                                                                             | <b>2</b> | <b>4</b> | <b>5</b> | Bonds                                                                              | <b>3</b> |
|-----------------------------------------------------------------------------------|----------|----------|----------|------------------------------------------------------------------------------------|----------|
| 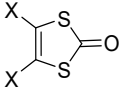 | X = S    | X = Si   | X = C    |  | X = Si   |
| C—X                                                                               | 1.761(4) | 1.874(2) | 1.390(3) | C—X                                                                                | 1.883(3) |
|                                                                                   | 1.765(4) | 1.875(2) | 1.390(4) |                                                                                    | 1.883(3) |
| C=C                                                                               | 1.336(6) | 1.354(2) | 1.397(4) | C=C                                                                                | 1.354(4) |
| C—S                                                                               | 1.745(4) | 1.749(2) | 1.747(3) | C—S                                                                                | 1.748(3) |
|                                                                                   | 1.745(4) | 1.751(2) | 1.750(3) |                                                                                    | 1.744(3) |
| S—C                                                                               | 1.785(4) | 1.769(2) | 1.774(3) | S—C                                                                                | 1.728(3) |
|                                                                                   | 1.780(4) | 1.768(2) | 1.778(3) |                                                                                    | 1.728(3) |
| C=O                                                                               | 1.211(5) | 1.208(2) | 1.200(3) | C=S                                                                                | 1.652(3) |

If we compare the bond lengths of the proligands within the bisdithiole-2-one series, compounds **2**, **4** and **5**, besides the expected changes in the bond lengths of C—X (X = S, Si and C), the main difference is observed in the C=C bond, of the dithiole ring. Indeed, the shortest one is for the dithiine **2** and the longest for the aromatic ring of the benzo-fused **5**.

**Table S2** Significant bond lengths (Å) and angles (°) of **Cp<sub>2</sub>MoS<sub>2</sub>** and **Cp<sub>2</sub>MoS<sub>2</sub>CO**

| Bonds                                                                               | <b>Cp<sub>2</sub>MoS<sub>2</sub></b> | Bonds                                                                               | <b>Cp<sub>2</sub>MoS<sub>2</sub>CO</b> |            |
|-------------------------------------------------------------------------------------|--------------------------------------|-------------------------------------------------------------------------------------|----------------------------------------|------------|
|  |                                      |  | <b>Mo1</b>                             | <b>Mo2</b> |
|                                                                                     |                                      | C=O                                                                                 | 1.208(13)                              | 1.206(17)  |
|                                                                                     |                                      | C—S                                                                                 | 1.761(11)                              | 1.765(11)  |
| S—S                                                                                 | 2.055(3)                             |                                                                                     |                                        | 1.766(11)  |
| S—Mo                                                                                | 2.459(2)                             | S—Mo                                                                                | 2.457(3)                               | 2.454(3)   |
|                                                                                     | 2.455(3)                             |                                                                                     | 2.457(3)                               | 2.458(3)   |
|                                                                                     | 49.4(1)                              |                                                                                     | 70.5(1)                                | 70.6(1)    |

The **Cp<sub>2</sub>MoS<sub>2</sub>CO** crystallizes in the monoclinic system, space group *Cc* and the unit cell contains two crystallographically independent molecules, both in general position. The **Cp<sub>2</sub>MoS<sub>2</sub>** crystallizes in the orthorhombic system, space group *P2<sub>1</sub>2<sub>1</sub>2<sub>1</sub>* and the unit cell contains one crystallographically independent molecule in general position. The two **Cp<sub>2</sub>MoS<sub>2</sub>CO** complexes present similar bond lengths but the shape of the metallacycles MoS<sub>2</sub>C is different as the one with Mo1 is slightly distorted along the S---S axis by 4.3(4)° and the one with Mo2 is planar. On the other hand, the S—Mo—S angle decreases significantly with the size of the metallacycle since it goes from 82.4° in the five membered ring of **Modt** to 70.6° in the four membered ring in **Cp<sub>2</sub>MoS<sub>2</sub>CO** to reach 49.4° in the 3 membered ring of **Cp<sub>2</sub>MoS<sub>2</sub>**.

**Table S3** Crystallographic data of compounds **2**, **3**, **4** and **5**

|                                             | <b>2</b>                                     | <b>3</b>                                                       | <b>4</b>                                                                      | <b>5</b>                                                    |
|---------------------------------------------|----------------------------------------------|----------------------------------------------------------------|-------------------------------------------------------------------------------|-------------------------------------------------------------|
| Formulae                                    | C <sub>6</sub> O <sub>2</sub> S <sub>6</sub> | C <sub>10</sub> H <sub>12</sub> S <sub>6</sub> Si <sub>2</sub> | C <sub>10</sub> H <sub>12</sub> O <sub>2</sub> S <sub>4</sub> Si <sub>2</sub> | C <sub>8</sub> H <sub>2</sub> O <sub>2</sub> S <sub>4</sub> |
| FW (g.mol <sup>-1</sup> )                   | 296.42                                       | 380.74                                                         | 348.62                                                                        | 258.34                                                      |
| System                                      | orthorhombic                                 | monoclinic                                                     | monoclinic                                                                    | monoclinic                                                  |
| Space group                                 | <i>Fdd2</i>                                  | <i>P2<sub>1</sub>/c</i>                                        | <i>P2<sub>1</sub>/c</i>                                                       | <i>P2<sub>1</sub>/c</i>                                     |
| a (Å)                                       | 17.925(2)                                    | 6.6939(16)                                                     | 6.9743(10)                                                                    | 3.8723(7)                                                   |
| b (Å)                                       | 26.902(3)                                    | 7.9864(19)                                                     | 8.8737(11)                                                                    | 11.708(2)                                                   |
| c (Å)                                       | 3.9069(4)                                    | 15.384(4)                                                      | 12.5077(14)                                                                   | 9.9274(17)                                                  |
| α (deg)                                     | 90                                           | 90                                                             | 90                                                                            | 90                                                          |
| β (deg)                                     | 90                                           | 90.118(11)                                                     | 94.939(6)                                                                     | 90.310(7)                                                   |
| γ (deg)                                     | 90                                           | 90                                                             | 90                                                                            | 90                                                          |
| V (Å <sup>3</sup> )                         | 1884.0(4)                                    | 822.5(3)                                                       | 771.20(17)                                                                    | 450.06(14)                                                  |
| T (K)                                       | 150(2)                                       | 150(2)                                                         | 150(2)                                                                        | 150(2)                                                      |
| Z                                           | 8                                            | 2                                                              | 2                                                                             | 2                                                           |
| D <sub>calc</sub> (g.cm <sup>-3</sup> )     | 2.090                                        | 1.537                                                          | 1.501                                                                         | 1.906                                                       |
| μ (mm <sup>-1</sup> )                       | 1.412                                        | 0.957                                                          | 0.761                                                                         | 1.016                                                       |
| Total refls                                 | 1909                                         | 3474                                                           | 8227                                                                          | 3667                                                        |
| Abs corr                                    | multi-scan                                   | multi-scan                                                     | multi-scan                                                                    | multi-scan                                                  |
| Uniq refls (R <sub>int</sub> )              | 1020 (0.0216)                                | 1845 (0.0298)                                                  | 1772 (0.0405)                                                                 | 1019 (0.0408)                                               |
| Uniq refls (I > 2σ(I))                      | 957                                          | 1374                                                           | 1537                                                                          | 963                                                         |
| R <sub>1</sub> , wR <sub>2</sub>            | 0.0312, 0.0679                               | 0.0407, 0.0843                                                 | 0.0297, 0.0686                                                                | 0.0344, 0.0826                                              |
| R <sub>1</sub> , wR <sub>2</sub> (all data) | 0.0340, 0.0692                               | 0.0626, 0.0946                                                 | 0.0352, 0.0699                                                                | 0.0376, 0.0846                                              |
| GOF                                         | 1.056                                        | 0.981                                                          | 1.134                                                                         | 1.017                                                       |

**Table S4** Crystallographic data mononuclear complexes

|                                         | <b>Modt</b>                                      | <b>Cp<sub>2</sub>MoS<sub>2</sub></b>             | <b>Cp<sub>2</sub>MoS<sub>2</sub>CO</b>            | <b>MoSi<sub>2</sub></b>                                           |
|-----------------------------------------|--------------------------------------------------|--------------------------------------------------|---------------------------------------------------|-------------------------------------------------------------------|
| Formulae                                | C <sub>12</sub> H <sub>12</sub> MoS <sub>2</sub> | C <sub>10</sub> H <sub>10</sub> MoS <sub>2</sub> | C <sub>11</sub> H <sub>10</sub> MoOS <sub>2</sub> | C <sub>19</sub> H <sub>22</sub> MoOS <sub>4</sub> Si <sub>2</sub> |
| FW (g.mol <sup>-1</sup> )               | 316.28                                           | 290.24                                           | 318.25                                            | 546.72                                                            |
| System                                  | monoclinic                                       | orthorhombic                                     | monoclinic                                        | monoclinic                                                        |
| Space group                             | <i>P2<sub>1</sub>/n</i>                          | <i>P2<sub>1</sub>2<sub>1</sub>2<sub>1</sub></i>  | <i>Cc</i>                                         | <i>P2<sub>1</sub>/c</i>                                           |
| a (Å)                                   | 11.3393(11)                                      | 5.9374(4)                                        | 12.0971(13)                                       | 11.8373(13)                                                       |
| b (Å)                                   | 7.7186(7)                                        | 12.6972(7)                                       | 10.8907(12)                                       | 15.1681(15)                                                       |
| c (Å)                                   | 13.8396(13)                                      | 13.0938(7)                                       | 16.869(2)                                         | 12.7361(12)                                                       |
| α (deg)                                 | 90                                               | 90                                               | 90                                                | 90                                                                |
| β (deg)                                 | 114.361(3)                                       | 90                                               | 102.634(4)                                        | 103.610(4)                                                        |
| γ (deg)                                 | 90                                               | 90                                               | 90                                                | 90                                                                |
| V (Å <sup>3</sup> )                     | 1103.44(18)                                      | 987.12(10)                                       | 2168.6(4)                                         | 2222.5(4)                                                         |
| T (K)                                   | 150(2)                                           | 150(2)                                           | 150(2)                                            | 150(2)                                                            |
| Z                                       | 4                                                | 4                                                | 8                                                 | 4                                                                 |
| D <sub>calc</sub> (g.cm <sup>-3</sup> ) | 1.904                                            | 1.953                                            | 1.949                                             | 1.634                                                             |
| μ (mm <sup>-1</sup> )                   | 1.526                                            | 1.696                                            | 1.560                                             | 1.082                                                             |
| Total refls                             | 16085                                            | 3770                                             | 8162                                              | 22053                                                             |
| Abs corr                                | multi-scan                                       | multi-scan                                       | multi-scan                                        | multi-scan                                                        |
| Uniq refls (R <sub>int</sub> )          | 2509 (0.0498)                                    | 2131 (0.0235)                                    | 4096 (0.0331)                                     | 5089 (0.0371)                                                     |
| Uniq refls (I > 2σ(I))                  | 2348                                             | 1941                                             | 4051                                              | 4454                                                              |

|                        |                |                |                |                |
|------------------------|----------------|----------------|----------------|----------------|
| $2\sigma(I)$           |                |                |                |                |
| $R_1, wR_2$            | 0.0263, 0.0664 | 0.0432, 0.0900 | 0.0617, 0.1540 | 0.0453, 0.1224 |
| $R_1, wR_2$ (all data) | 0.0280, 0.0689 | 0.0483, 0.0935 | 0.0619, 0.1544 | 0.0521, 0.1299 |
| GOF                    | 1.048          | 0.993          | 1.081          | 1.006          |

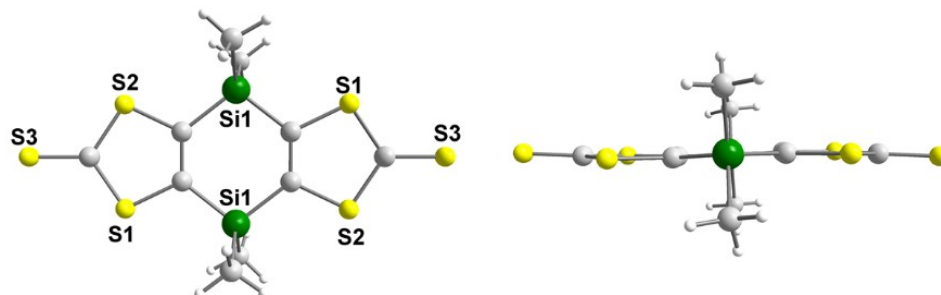

Fig. S1 Top and side views of the molecular structure of compound 3

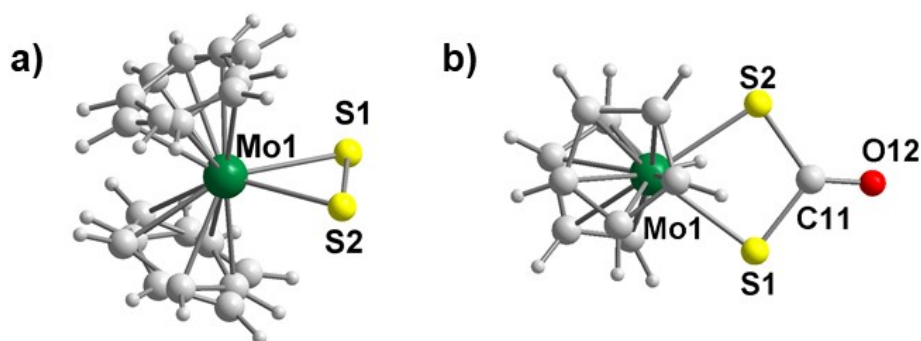

Fig. S2 Molecular structures of  $\text{Cp}_2\text{MoS}_2$  (a) and  $\text{Cp}_2\text{MoS}_2\text{CO}$  (b).

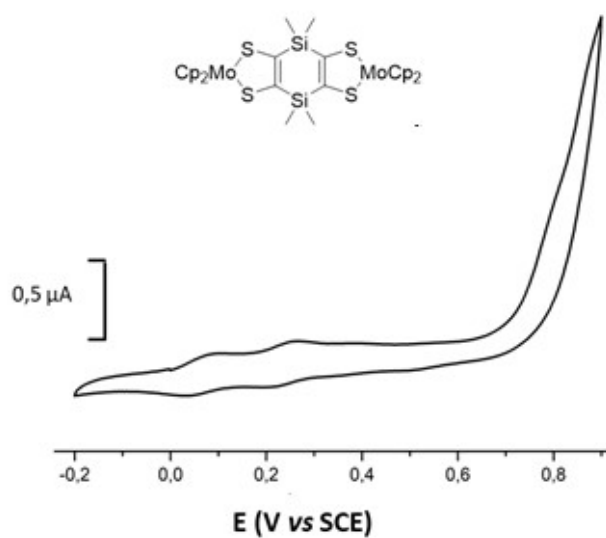

**Fig. S3** Cyclic voltammogram of  $\text{Mo}_2\text{Si}_2$  in DMSO with  $\text{Bu}_4\text{NPF}_6$  0.1 M (100 mV/s).

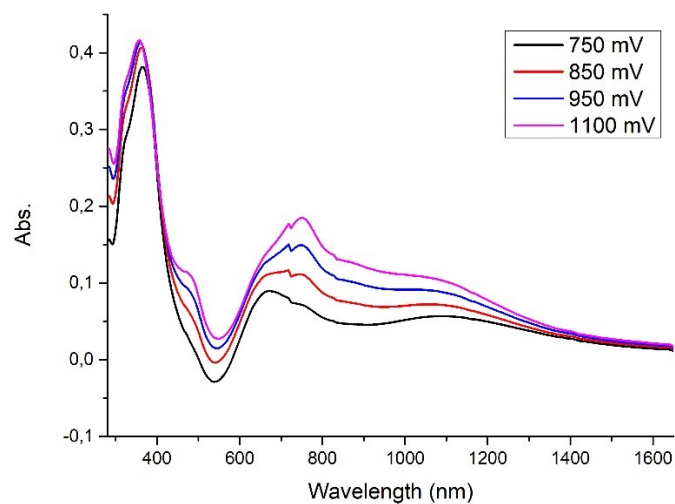

**Fig. S4** Differential UV-vis-NIR absorption spectra of the **Modt** complex monitored from the monocation radical state to the dicationic state upon electrochemical oxidation in  $\text{CH}_2\text{Cl}_2$ - $[\text{Bu}_4\text{N}][\text{PF}_6]$

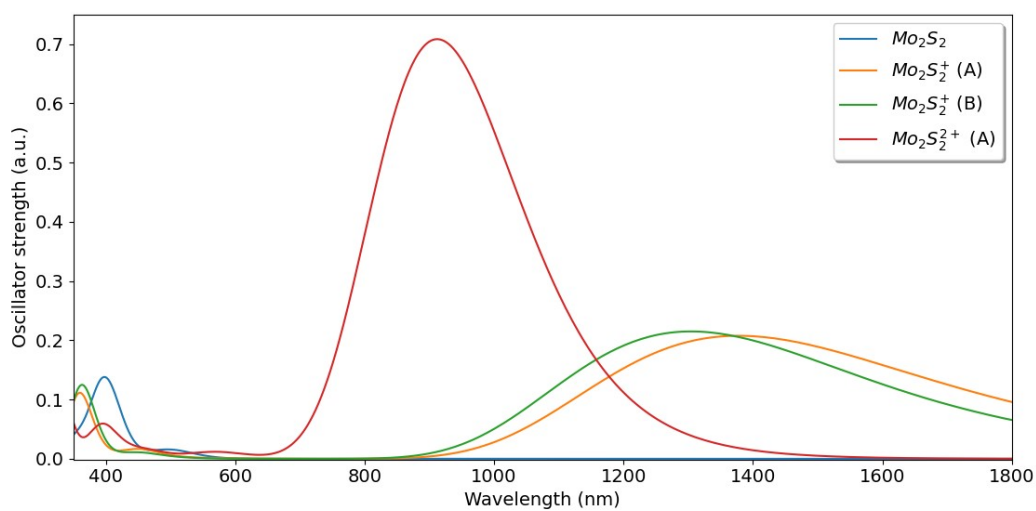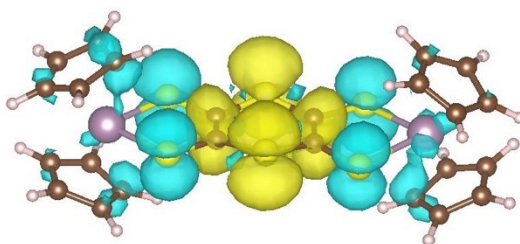

**Fig. S5** Top: simulated UV-vis-NIR absorption spectra of  $\text{Mo}_2\text{S}_2$ ,  $\text{Mo}_2\text{S}_2^{+\bullet}$  and  $\text{Mo}_2\text{S}_2^{2+}$  computed at the CAM-B3LPY/def2-TZVP with CPCM(DMSO). Bottom: Characteristic charge density difference plots of the first excited state of  $\text{Mo}_2\text{S}_2^{2+}$  absorbing around 1000 nm.

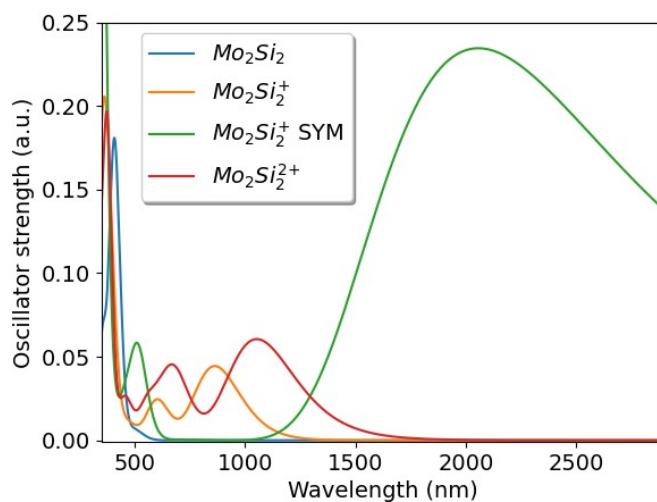

**Fig. S6** UV-vis-NIR absorption spectra of  $\text{Mo}_2\text{Si}_2$ ,  $\text{Mo}_2\text{Si}_2^{+\bullet}$ ; and  $\text{Mo}_2\text{Si}_2^{2+(\bullet)}$  computed at the CAM-B3LPY/def2-TZVP with CPCM(DMSO).

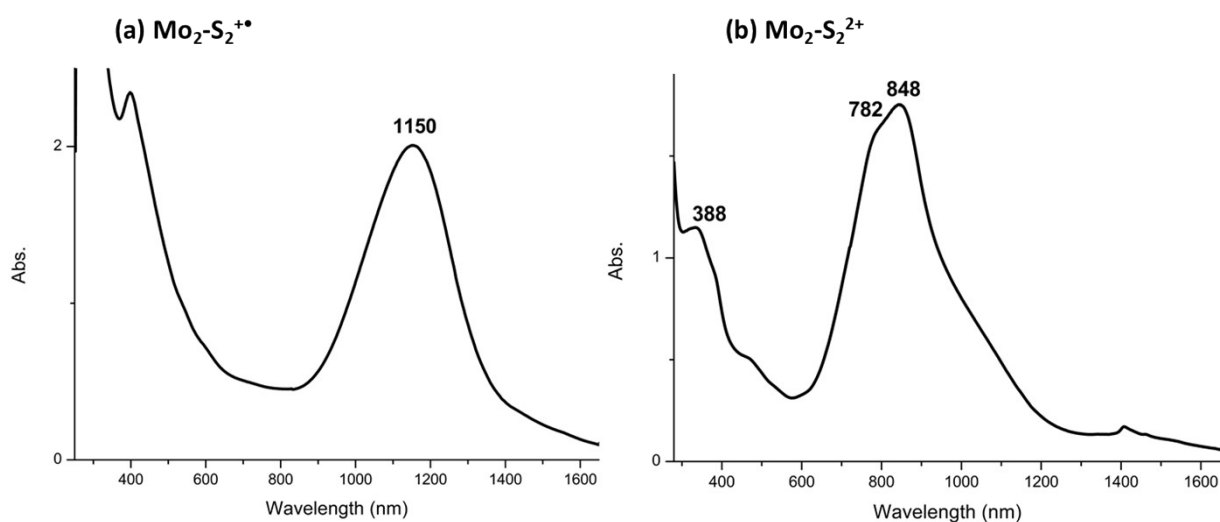

**Fig. S7** UV-vis-NIR spectrum of (a)  $\text{Mo}_2\text{S}_2^{+\bullet}$  in DMSO; (b)  $\text{Mo}_2\text{S}_2^{2+}$  in MeCN.

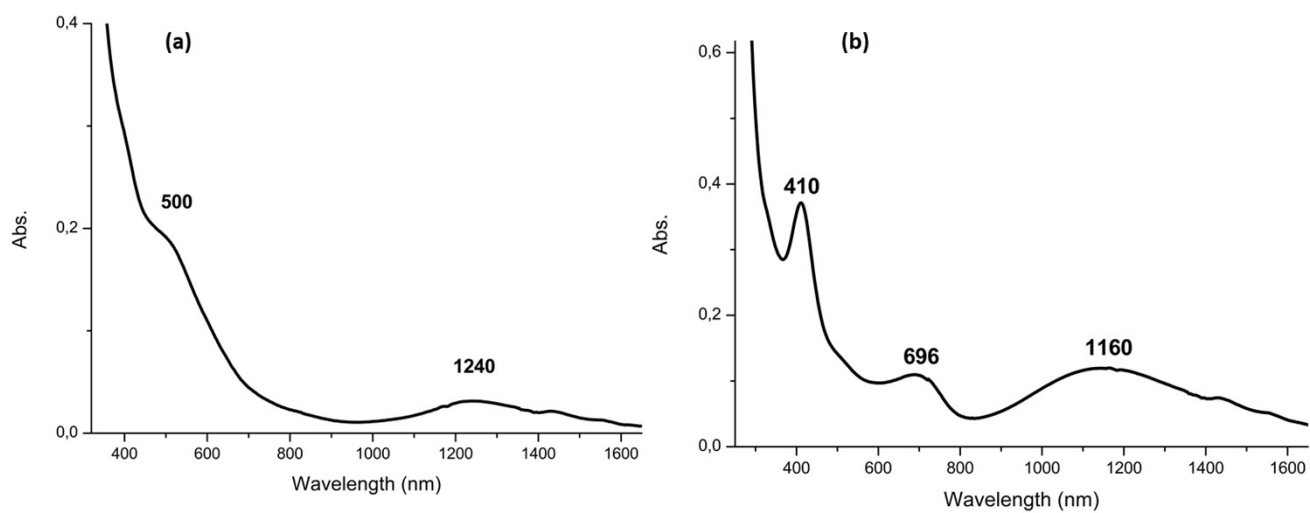

Fig. S8 UV-vis-NIR spectrum of (a)  $\text{Mo}_2\text{Si}_2^{+}$ , (b)  $\text{Mo}_2\text{Si}_2^{2+}$  in DMSO

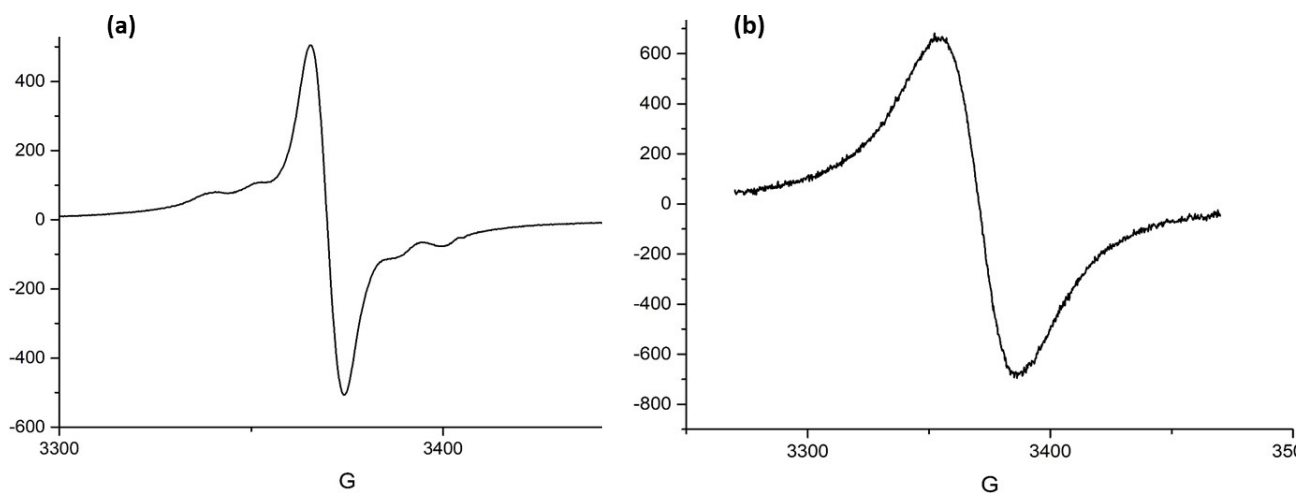

Fig. S9. EPR spectra of  $(\text{Mo}_2\text{Si}_2)(\text{BF}_4)_2$  in  $\text{CH}_3\text{CN}$ : (a) at room temperature; (b) frozen solution

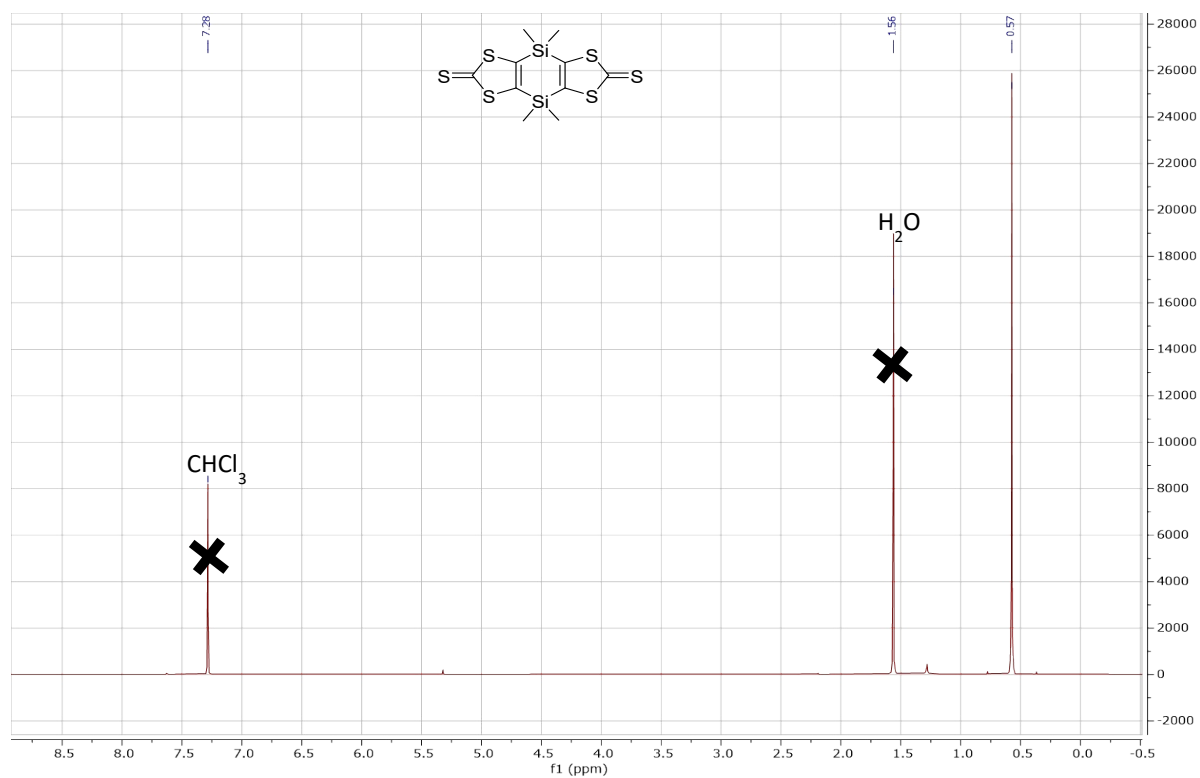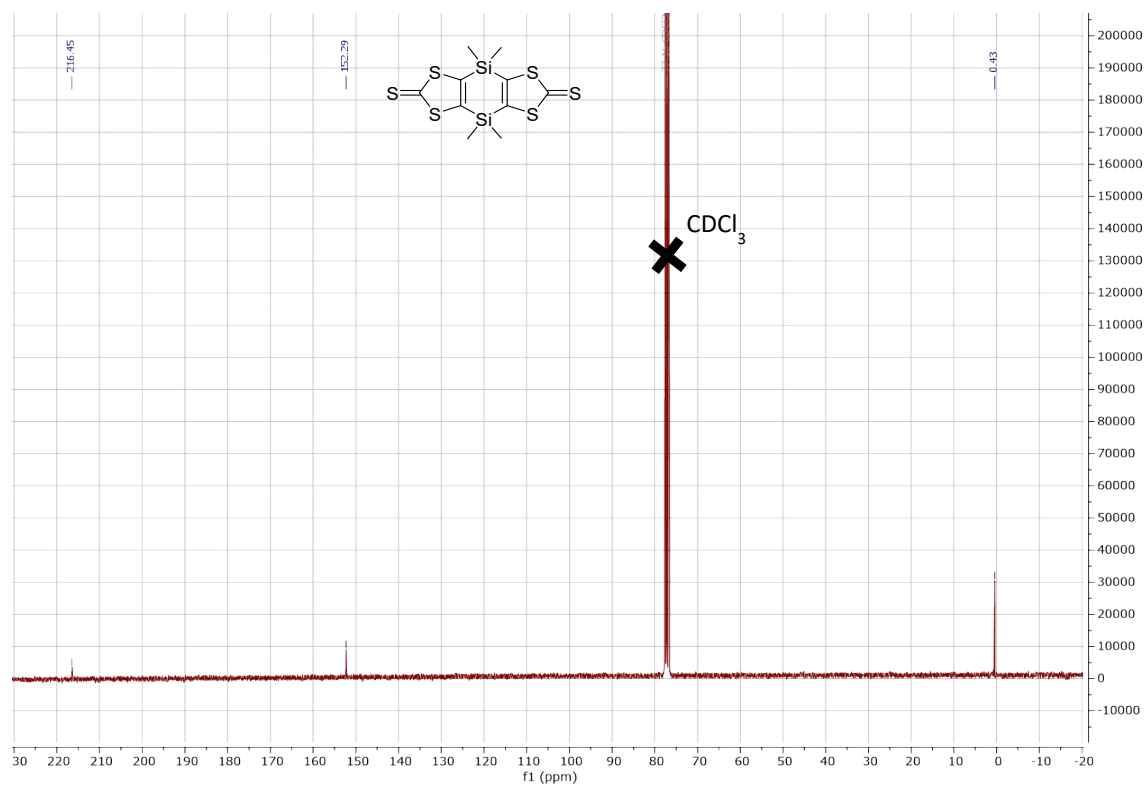



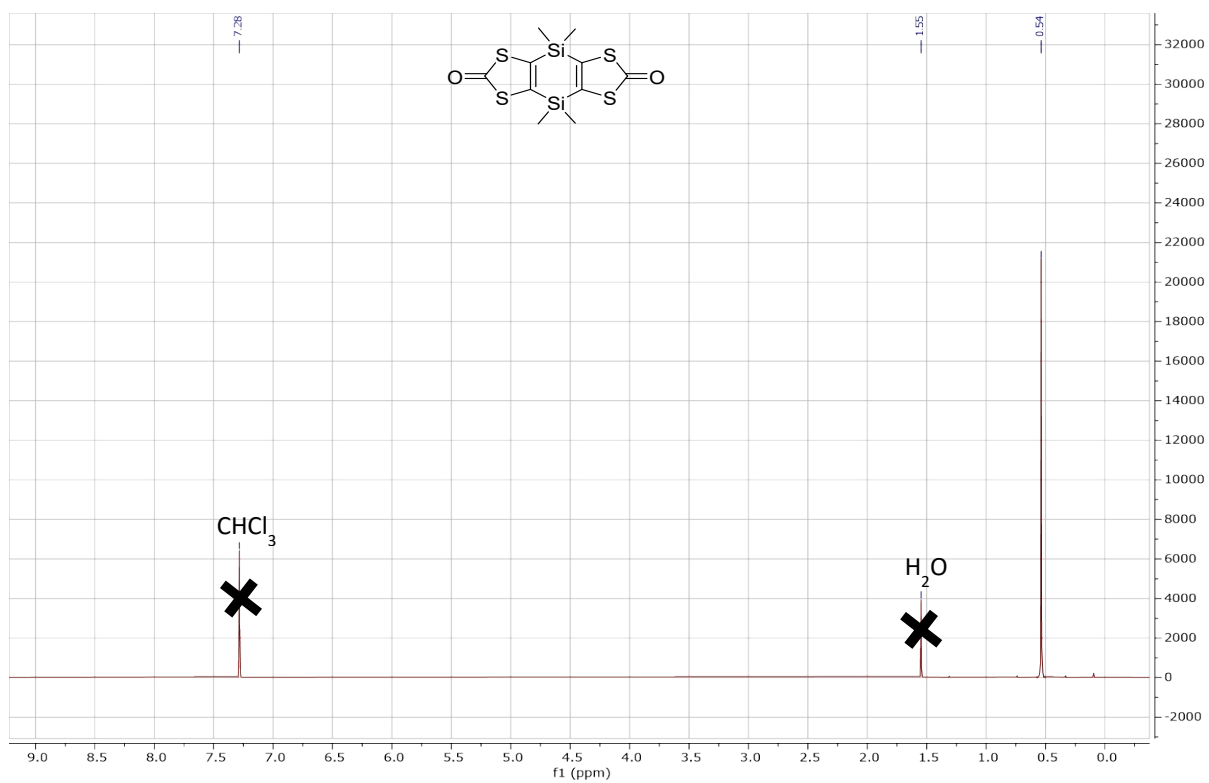

Fig. S12  $^1\text{H}$  NMR (300 MHz) of 4 in  $\text{CDCl}_3$

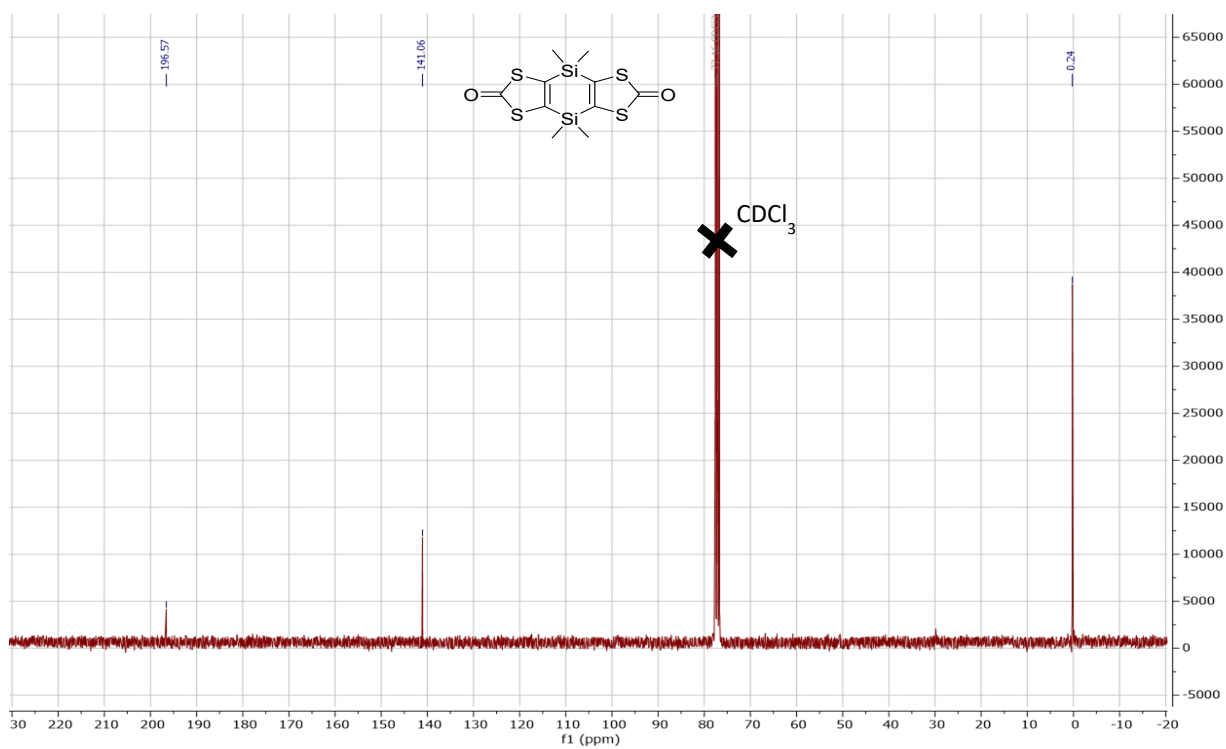

Fig. S13  $^{13}\text{C}$  NMR (75 MHz) of 4 in  $\text{CDCl}_3$

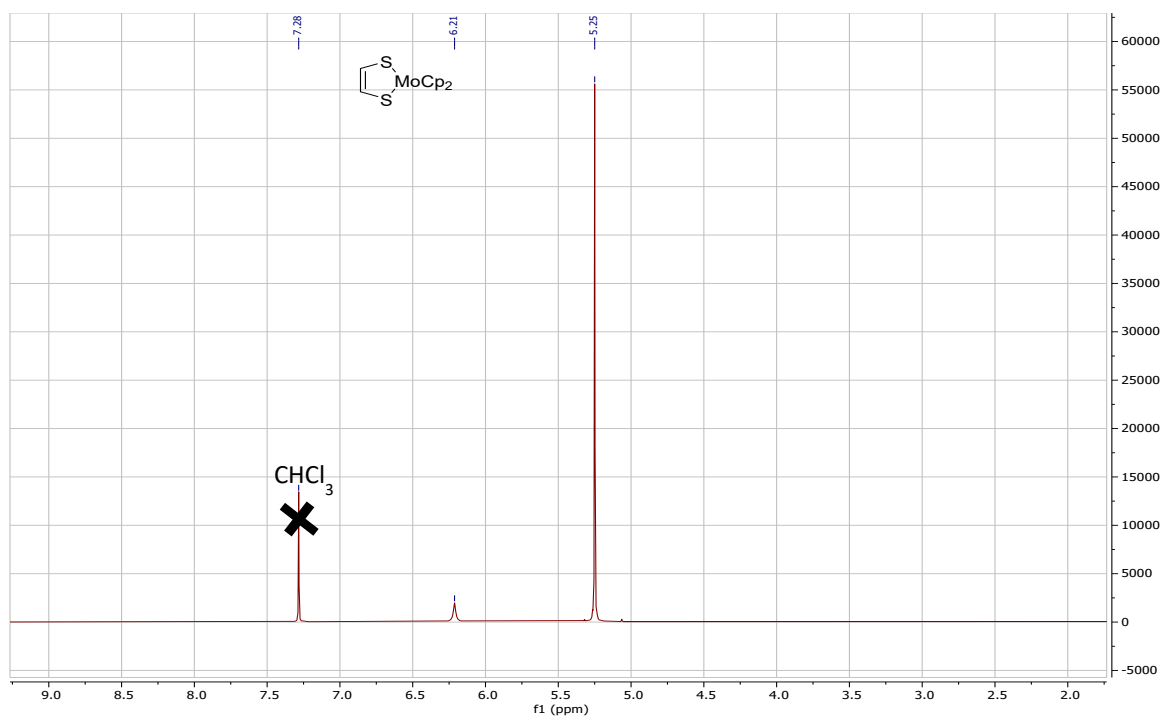

**Fig. S14** <sup>1</sup>H NMR (300 MHz) of **Modt** in CDCl<sub>3</sub>

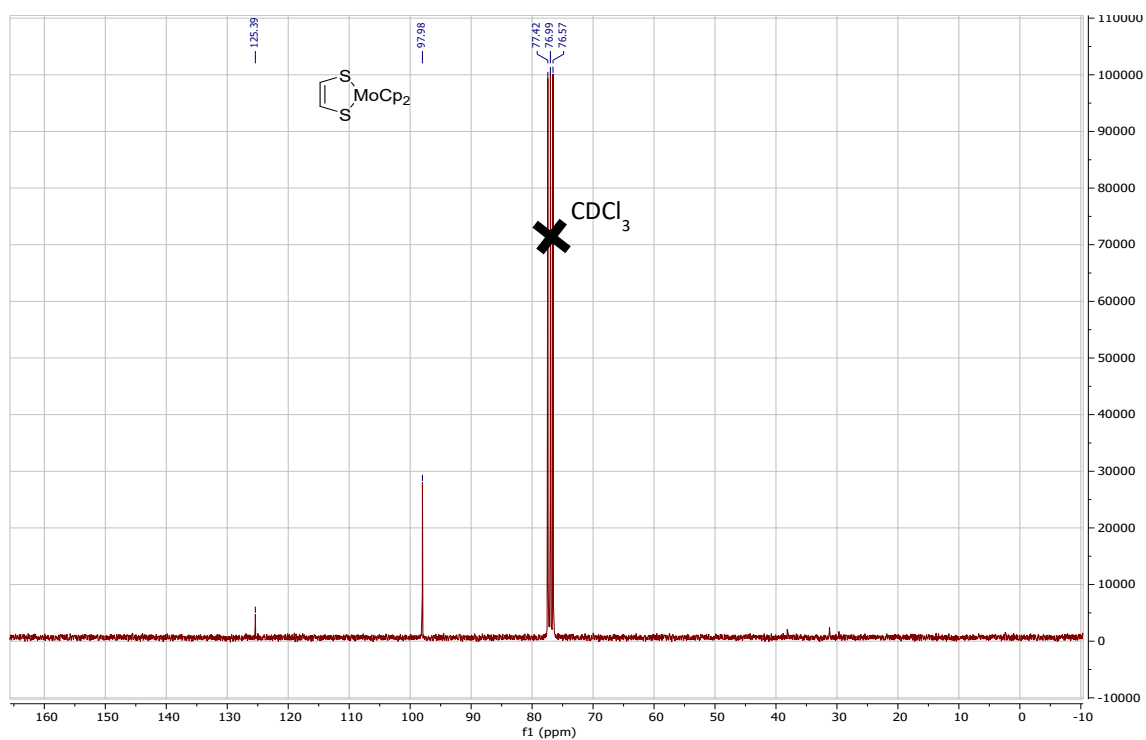

**Fig. S15** <sup>13</sup>C NMR (75 MHz) of **Modt** in CDCl<sub>3</sub>

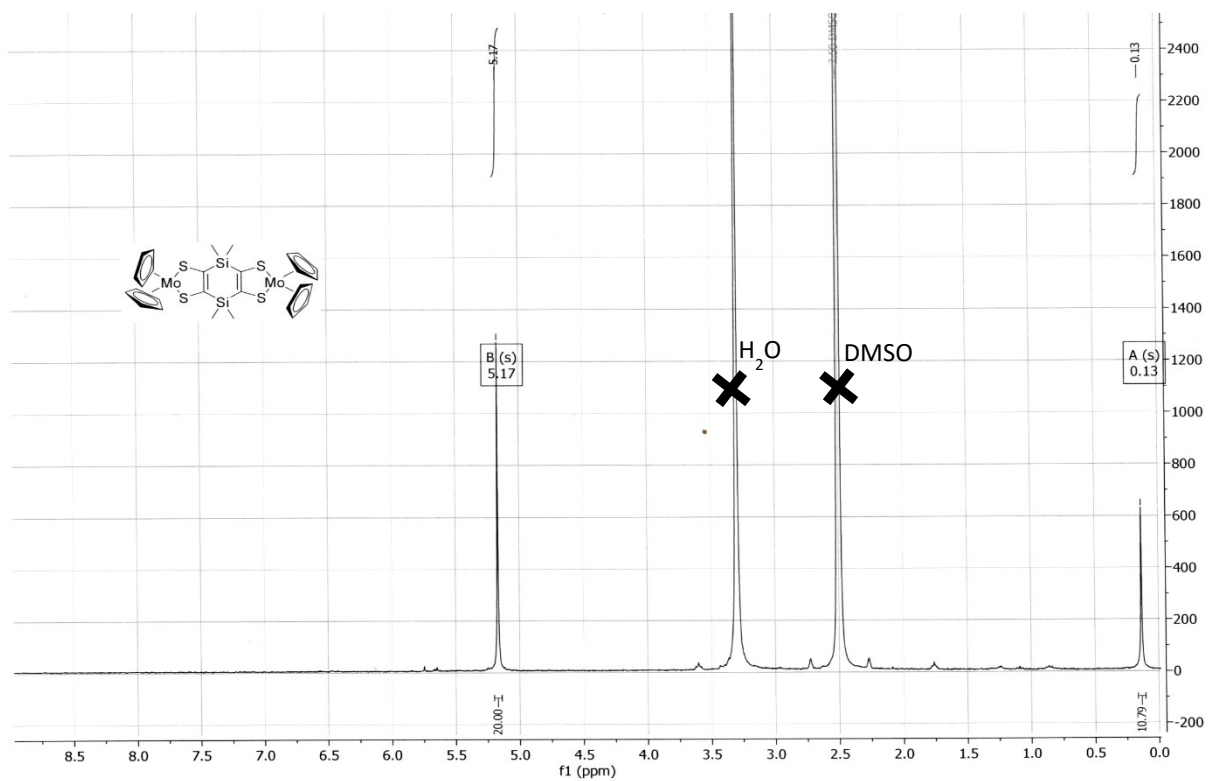

Fig. S16  $^1\text{H}$  NMR (400 MHz) of  $\text{Mo}_2\text{Si}_2$  in  $(\text{CD}_3)_2\text{SO}$

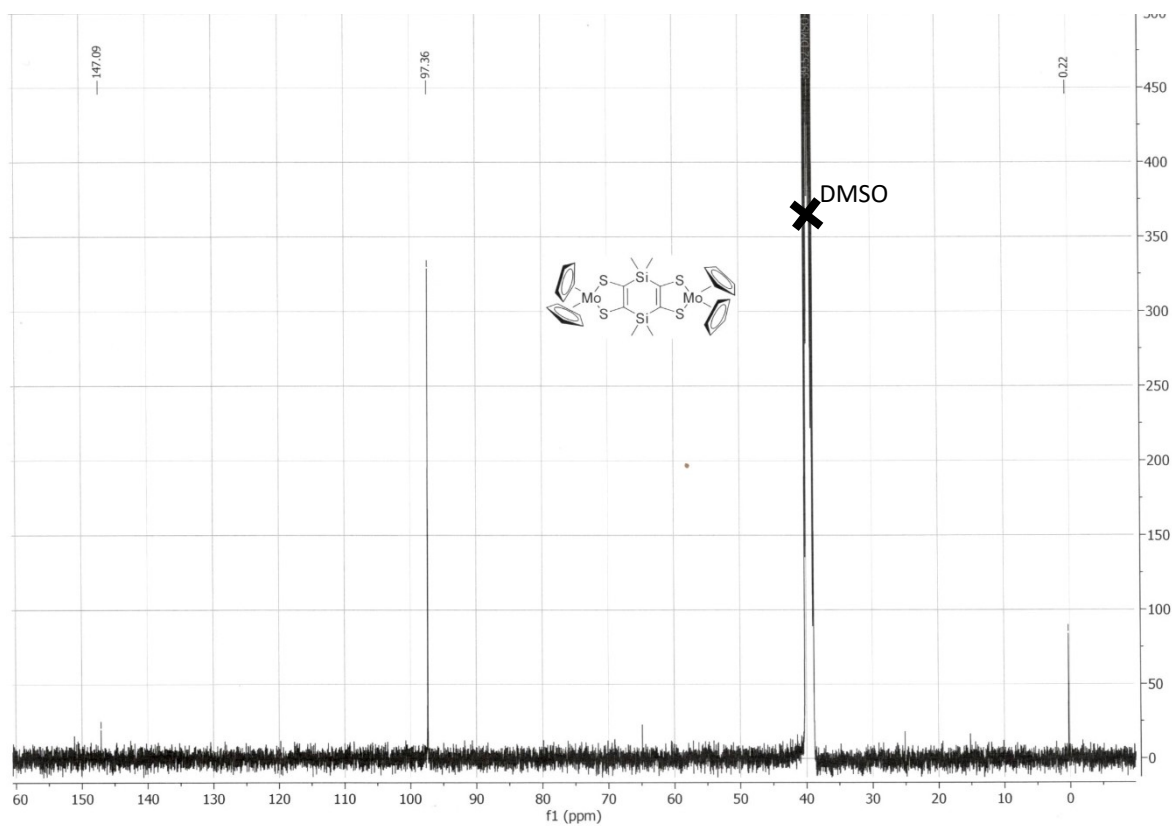

Fig. S17  $^{13}\text{C}$  NMR (101 MHz) of  $\text{Mo}_2\text{Si}_2$  in  $(\text{CD}_3)_2\text{SO}$

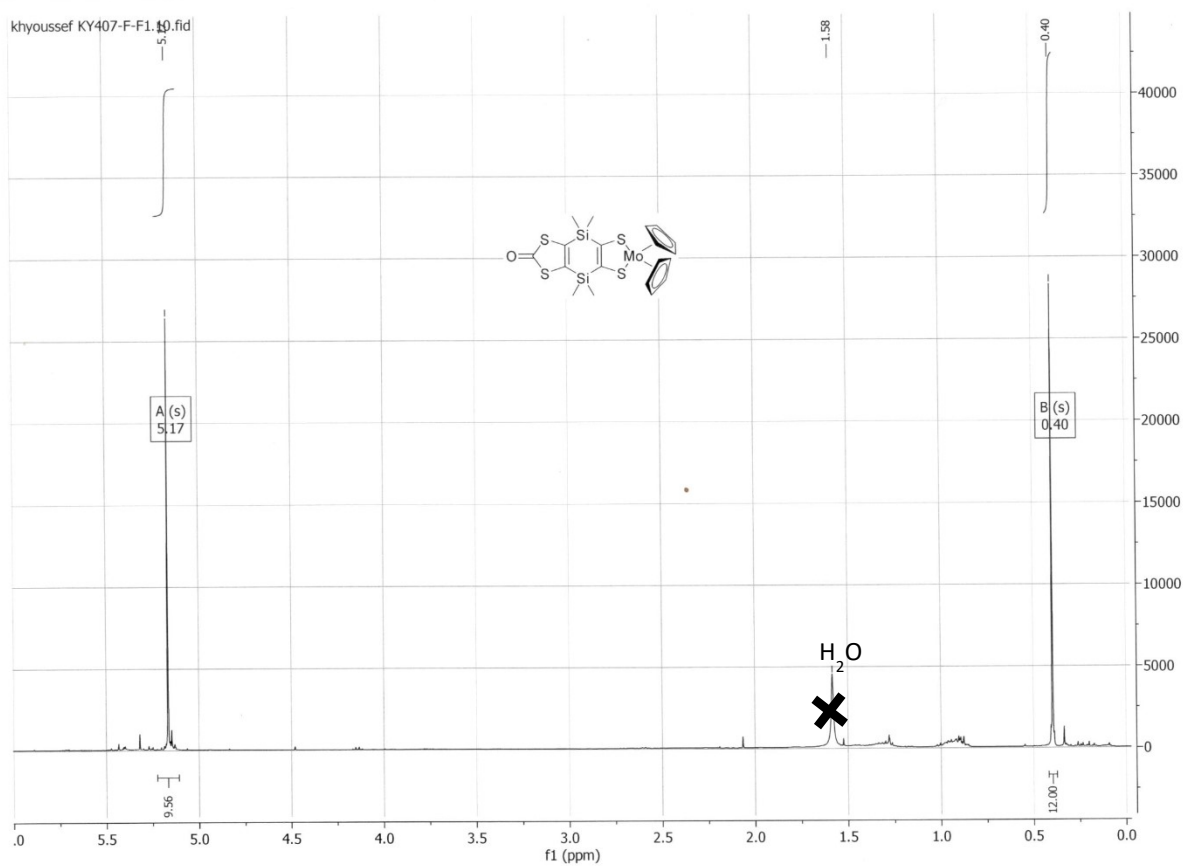

**Fig. S18**  $^1\text{H}$  NMR (400 MHz) of  $\text{MoSi}_2$  in  $\text{CDCl}_3$

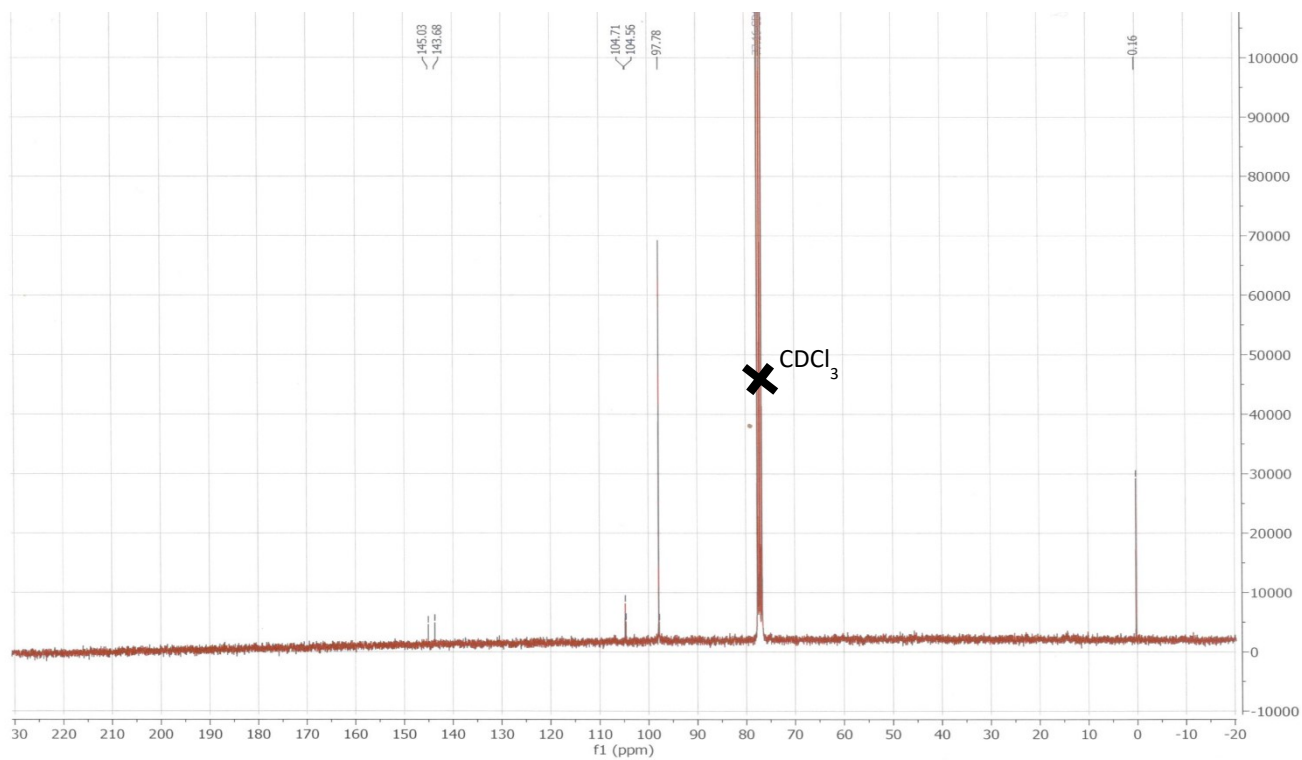

**Fig. S19**  $^{13}\text{C}$  NMR (75 MHz) of  $\text{MoSi}_2$  in  $\text{CDCl}_3$

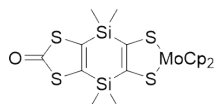

Centre régional de mesures physiques de l'Ouest (CRMPO) - RAPPORT D'ANALYSE

Analysis Info  
 Analysis Name D:\Data\CRMPO\ASAP\_14943\_MS\_01.d  
 Method ASAP\_CRMPO\_tune\_low.m  
 Sample Name KY 407 F  
 Comment K. YOUSSEF KY 407 F Température :230°C

Acquisition Date 8/29/2023 10:51:00 AM  
 Operator Nicolas BONNET  
 Instrument maXis

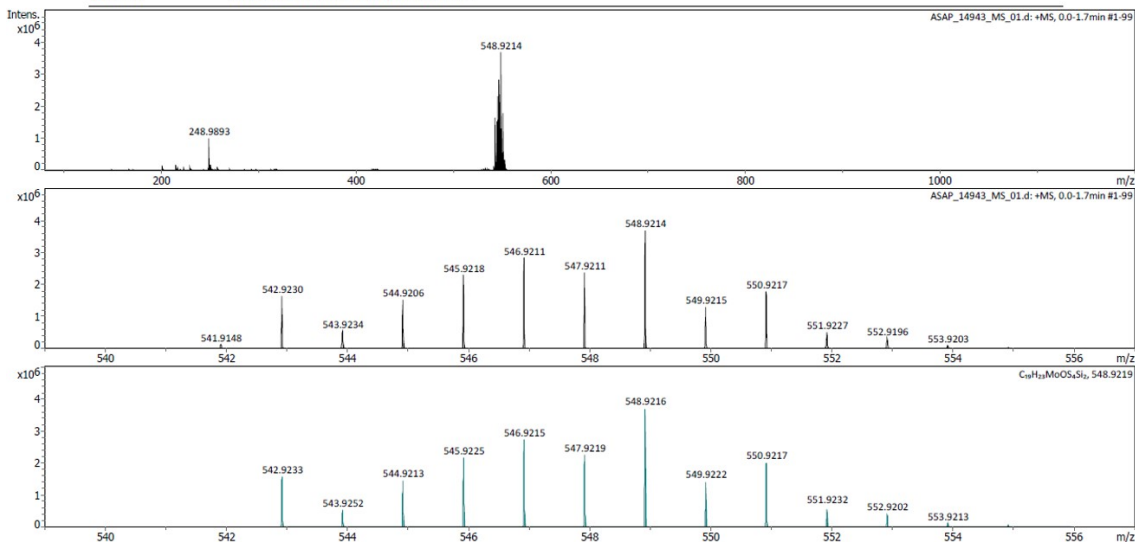

Fig. S20 HRMS of MoSi<sub>2</sub>

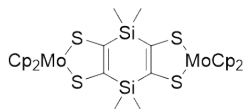

Centre régional de mesures physiques de l'Ouest (CRMPO) - RAPPORT D'ANALYSE

K. YOUSSEF KY 398 P

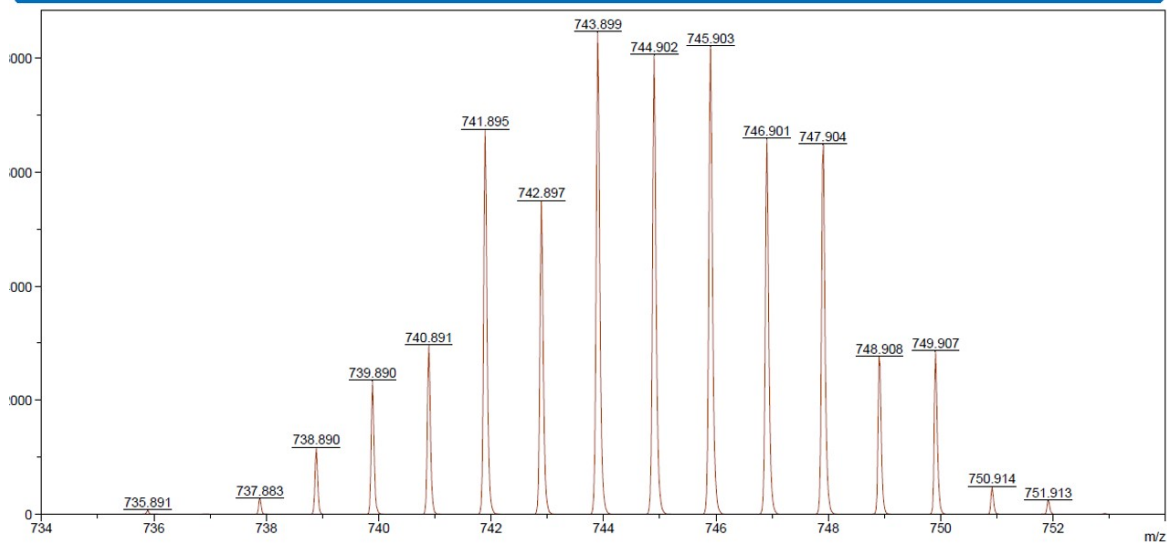

Date of Acquisition 2023-05-10T18:20:42.656+02:00  
 Acquisition method D:\Methods\ifexControlMethods\RP\_PepMix.par  
 Processing method Matrice : DCTB  
 File Name D:\Data\CRMPO\MALDI\_14802\_MS\_01\10\_C21

Bruker Daltonics

Fig. S21 HRMS of Mo<sub>2</sub>Si<sub>2</sub>

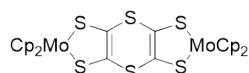

Centre régional de mesures physiques de l'Ouest (CRMPO) - RAPPORT D'ANALYSE

K. YOUSSEF KY 166

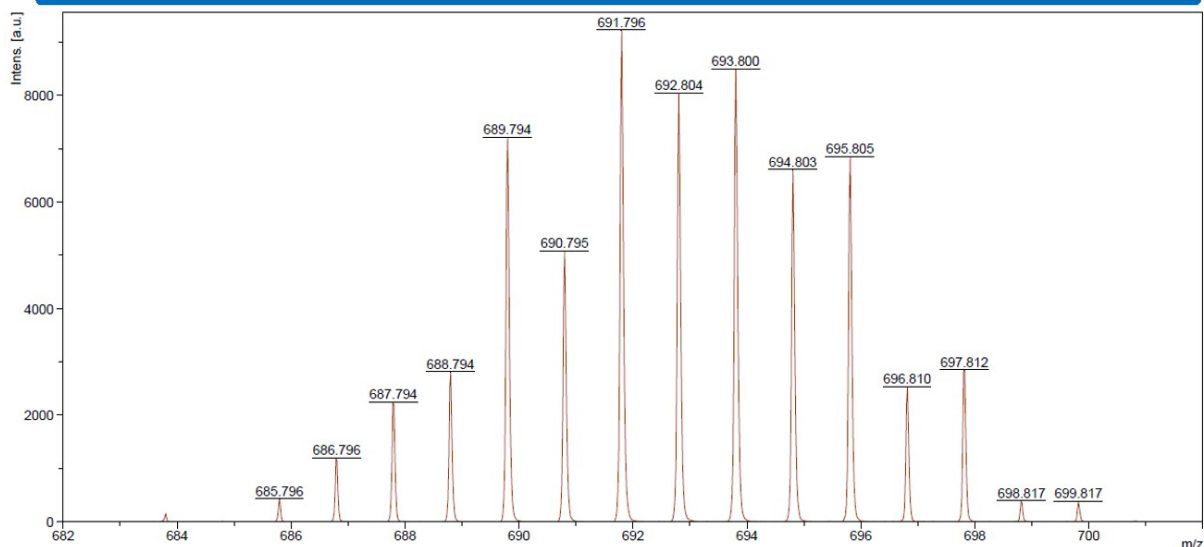

Date of Acquisition 2021-10-25T18:38:02.773+02:00  
 Acquisition method D:\Methods\flexControlMethods\RP\_PepMix.par  
 Processing method Matrice : DCTB  
 File Name D:\Data\CRMPO\MALDI\_12786\_MS\_03\0\_P18\1

**Bruker Daltonics**

**Fig. S22 HRMS of Mo<sub>2</sub>S<sub>2</sub>**

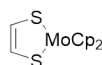

Centre régional de mesures physiques de l'Ouest (CRMPO) - RAPPORT D'ANALYSE

**Analysis Info**  
 Analysis Name D:\Data\CRMPO\ASAP\_13460\_MS\_01.d  
 Method ASAP\_CRMPO\_tune\_low.m  
 Sample Name KY 259  
 Comment K. YOUSSEF KY 259 Température : 130°C

Acquisition Date 5/12/2022 12:00:41 PM  
 Operator Fabian LAMBERT  
 Instrument maXis

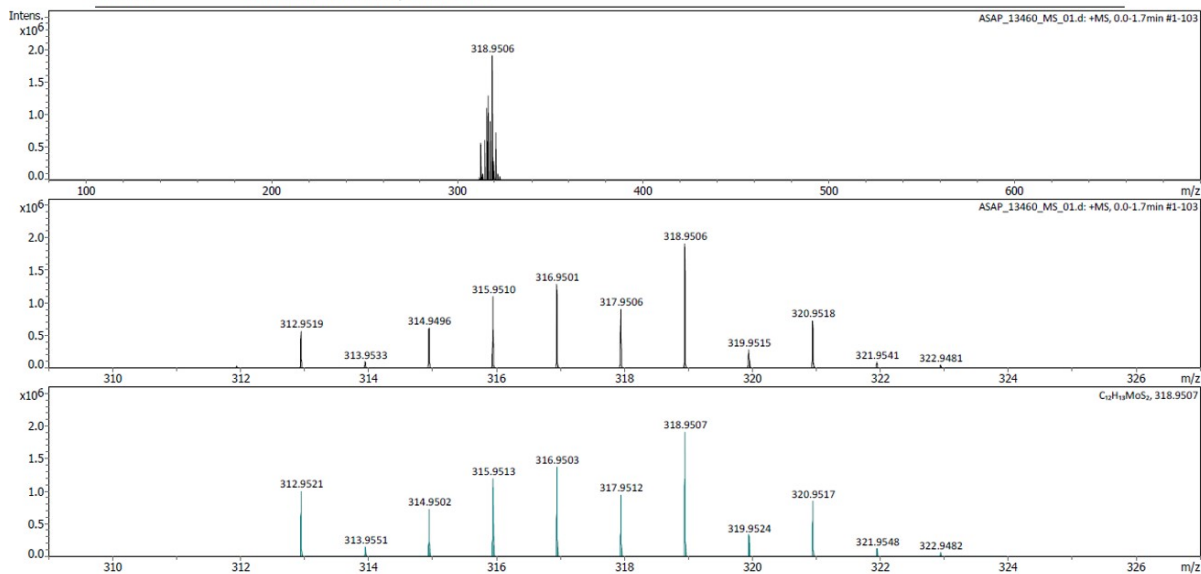

**Fig. S23 HRMS of MoDt**
